1

2

3 The acute effects of knee extension exercises with different contraction durations on the  
4 subsequent maximal knee extension torque for athletes with different strength levels

5

6 Kaito Nakata<sup>1\*</sup> and Takaaki Mishima<sup>1,2</sup>

7

8 <sup>1</sup> Graduate School of Sport and Exercise Sciences, Osaka University of Health and Sport

9 Sciences, Sennan, Osaka, Japan

10 <sup>2</sup> Osaka University of Health and Sport Sciences, School of Health and Sport Sciences, Sennan,

11 Osaka, Japan

12

13 Short title: Effects of knee extension exercises on subsequent maximal knee extension torque

14

15 **\*Corresponding author:**

16 E-mail address: [nakakai.722@gmail.com](mailto:nakakai.722@gmail.com) (KN)

17

## 18 **Abstract**

19           Individuals with high fatigue resistance against a high-intensity conditioning activity (CA)  
20 may be able to avoid experiencing significant fatigue and enhance their voluntary performance. We  
21 examined whether the optimal contraction duration of dynamic knee extension exercises to maximize  
22 subsequent voluntary performance varies depending on the strength level of an individual. The study  
23 participants were 22 male American college football players. Initially, all participants performed a  
24 10-s maximal isometric knee extension exercise and were classified as stronger individuals ( $n = 8$ ) and  
25 weaker individuals ( $n = 8$ ) based on their relative muscle strength. Each group then performed three  
26 types of dynamic CA with different contraction durations (6 s [6-CA], 12 s [12-CA], and 18 s [18-  
27 CA]) in random order. To observe the time-course changes in post-activation potentiation and  
28 performance enhancement, the twitch torques induced by electrical stimulation and isokinetic knee  
29 extension torques at  $180^\circ/\text{s}$  were recorded before and after each CA. The twitch torque increased at 10  
30 s ( $29.5\% \pm 9.3\%$ ) and 1 min ( $18.5\% \pm 6.8\%$ ) after 6-CA for the stronger individuals ( $p < 0.05$ ).  
31 However, no post-activation potentiation was induced in the weaker individuals in either protocol.  
32 Voluntary performance increased at 4 ( $7.0\% \pm 4.5\%$ ) and 7 ( $8.2\% \pm 4.3\%$ ) min after 18-CA for

33 stronger individuals ( $p < 0.05$ ). However, there was no post-activation performance enhancement in  
34 either protocol for weaker individuals. Thus, CA with a relatively long contraction duration was  
35 optimal to maximize the subsequent voluntary performance for stronger individuals. It remains  
36 unknown whether CAs performed with relatively short or long contraction durations were optimal for  
37 weaker individuals.

38

## 39 **Introduction**

40           The twitch torque evoked by a single electrical stimulus is increased transiently after a  
41 maximal or submaximal conditioning activity (CA) [1,2]. This phenomenon is referred to as post-  
42 activation potentiation (PAP). The primary mechanism of PAP is the phosphorylation of myosin  
43 regulatory light chains (P-MRLC) during a CA [3,4]. P-MRLC transiently increases the sensitivity of  
44 actin–myosin interactions to a given amount of  $\text{Ca}^{2+}$ . As a result, the force-generating capability of the  
45 muscle is enhanced [5,6]. Several previous studies have reported that a CA can improve not only the  
46 twitch torque evoked by electrical stimulation but also the subsequent voluntary performance [7–11]  
47 called the post-activation performance enhancement (PAPE) [12]. Tillin and Bishop [6] described P-  
48 MRLC as one of the major mechanisms of PAPE.

49           The potentiating effect and fatigue associated with a CA coexist [13]. Therefore, an increase  
50 in the voluntary performance after a CA appears to depend on the net balance between fatigue and  
51 potentiation [6]. Specifically, voluntary performance may decrease if the effects of fatigue are  
52 dominant but increase if those of potentiation dominate or may remain unchanged if the effects of  
53 fatigue and potentiation are at similar levels. Therefore, in situations where coaches are attempting to

54 employ a CA to sufficiently enhance the subsequent voluntary performance, they need to consider  
55 both inducing the potentiating effect and suppressing the fatigue associated with a CA as much as  
56 possible.

57           The fact that the total contraction duration of a CA plays a crucial role in maximizing PAPE  
58 deserves more attention. If the total contraction duration of a CA is too short, the mechanisms  
59 associated with the potentiating effect may not be triggered. Seitz et al. [14] examined the effect of  
60 the total contraction duration of isokinetic dynamic knee extension exercises on PAP and PAPE. They  
61 observed that a minimum total contraction duration must be reached during a CA to trigger the  
62 mechanisms responsible for PAP and PAPE. However, if the total contraction duration of a CA is too  
63 long, the potentiating effect induced by the CA may be counteracted by significant fatigue. Hamada  
64 et al. [15] used a fatiguing protocol of 16 sets of 5-s maximal voluntary contraction (MVC) and  
65 induced twitch torque between each set to observe the time-course changes in PAP. Their results  
66 indicated that the fatigue accumulated by the continuous MVCs counteracted the potentiating effect  
67 of P-MRLC. Therefore, a CA with an excessively long total contraction duration that induces  
68 significant fatigue would not be suitable for enhancing the subsequent voluntary performance. It

69 follows that to effectively induce PAPE, it is necessary to identify the optimal total contraction  
70 duration of a CA that can sufficiently trigger the potentiating effect while minimizing the fatigue as  
71 much as possible.

72           Interestingly, previous studies have suggested that the magnitude of PAP [1] and fatigue  
73 [16–18] after a high-intensity CA vary depending on the strength level of an individual. Typically,  
74 stronger individuals (SI) have higher fast-twitch fiber content than weaker individuals (WI) [19,20].  
75 It should be noted that the activity of myosin light chain kinase, the enzyme that triggers P-MRLC, is  
76 more prevalent in fast-twitch fibers than in slow-twitch fibers, resulting in P-MRLC occurring more  
77 prominently in fast-twitch fibers [3]. Therefore, during a CA, SI with a higher content of fast-twitch  
78 fiber may cause greater P-MRLC than that caused by WI, resulting in higher PAP [6]. In addition, it  
79 must be noted that the fatigue resistance against a high-intensity CA is greater in individuals with  
80 higher relative muscle strength [16–18]. Previously, Miyamoto et al. [17] confirmed that after a 5-s  
81 maximal isometric knee extension exercise as a CA, the dynamic maximal knee extension torque  
82 increased between 1 and 3 mins but did not increase immediately after the CA. Nevertheless, after 12  
83 weeks of high-intensity knee extension training, the dynamic maximal knee extension torque

84 significantly increased, even immediately after the CA. The main reason for the earlier realization of  
85 PAPE after the intervention is that the individuals developed resistance to fatigue by chronic high-  
86 intensity resistance training, suppressing the remarkable fatigue associated with a high-intensity CA.  
87 This result implies that SI have a greater fatigue resistance to a high-intensity CA compared with that  
88 of WI. Given that the extent of PAP and fatigue after a high-intensity CA vary depending on the  
89 strength level of an individual, we hypothesized that the optimal contraction duration of a CA to  
90 maximize PAPE may differ between SI and WI.

91           If a high-intensity CA with a relatively long contraction duration (i.e., approximately 20 s)  
92 is performed, it is likely that PAPE is not achieved because significant fatigue may counteract the  
93 potentiating effect. However, SI with high fatigue resistance against a high-intensity CA may have the  
94 potential to suppress the development of significant fatigue and enhance the subsequent voluntary  
95 performance, even in the CA with a relatively long total contraction duration. Furthermore, in SI with  
96 a higher number of fast-twitch fibers, the PAP mechanism may be triggered to a great extent by the  
97 performance of CA with a long total contraction duration, resulting in a greater extent of PAPE. On  
98 the other hand, when a high-intensity CA with a relatively short contraction duration (i.e.,



99 approximately 5 s) is performed, the magnitude of the potentiating effect is expected to be lower than  
100 that observed when a high-volume CA is performed. However, a short contraction duration may  
101 produce less fatigue and allow the potentiating effect to dominate, even in WI with relatively low  
102 fatigue resistance. Thus, the optimal contraction duration of a CA to maximize PAPE may vary  
103 depending on the strength level of an individual. A recent meta-analysis reported that SI tend to show  
104 more PAPE when a high-intensity CA is performed at maximal repetition than at sub-maximal  
105 repetition, whereas the opposite may be observed for WI [21]. However, to the best of our knowledge,  
106 no studies have examined in detail whether the optimal contraction duration of a high-intensity CA  
107 differs among individuals with different muscle strength levels.

108           Therefore, this study aimed to verify whether the optimal contraction duration of a high-  
109 intensity CA to maximize PAPE varies depending on the strength level of an individual. We  
110 hypothesized that the CA with a relatively long contraction duration (i.e., approximately 20 s) would  
111 be optimal for SI, while the CA with a relatively short contraction duration (i.e., approximately 5 s)  
112 would be optimal for WI.

113

## 114 **Materials and methods**

### 115 **Participants**

116           Twenty-two male American college football players participated in this study. All  
117 participants had participated in regular resistance training for at least 6 months. During the  
118 experimental period, they were instructed to continue their daily routines and to not change their  
119 physical activity level and food and fluid intakes. Moreover, they were asked to avoid consuming  
120 depressive (e.g., alcohol) or ergogenic (e.g., coffee) substances 24 h prior to the experimental sessions.  
121 They had been free from musculoskeletal injuries for at least 1 year before the study. They were  
122 provided oral and written explanations of the purpose, contents, and procedures of this study prior to  
123 the experiment, and the experiment was conducted after obtaining their consent. This study was  
124 approved by the Ethics Review Committee of Osaka University of Health and Sport Sciences  
125 (approval number: 21-2). The study was conducted in conformity with the policy statement regarding  
126 the use of human participants by the Declaration of Helsinki.

127

### 128 **Study design**

129           This study was conducted over four sessions for each participant. In the first session, the  
130 participants were grouped into SI or WI based on their relative muscle strength, which was calculated  
131 by dividing the isometric maximal knee extension torque by the body weight. For the latter three  
132 sessions (i.e., experimental sessions), the participants who were classified as SI or WI in the first session  
133 were asked to participate. Each experimental session was conducted at least 24 h apart. All sessions  
134 were conducted between 10:00 AM and 3:00 PM in an indoor laboratory. To determine the optimal  
135 contraction duration of a CA to maximize PAPE, each participant performed three types of dynamic  
136 CAs with different total contraction durations (6 s [6-CA], 12 s [12-CA], and 18 s [18-CA]) in random  
137 order. The joint angular velocity of each CA was set at 60°/s. To observe the time-course changes in  
138 PAP and PAPE, before and after each CA, the twitch torques induced by electrical stimulation and  
139 voluntary knee extension torques at 180°/s were recorded. The repeatability (intraclass correlation  
140 coefficient [ICC]) of the peak torque of maximal voluntary isokinetic knee extension and twitch  
141 contraction was investigated in our preliminary study. The ICC values were 0.962 (0.897–0.989) and  
142 0.998 (0.995–1.000) for voluntary knee extension peak torque and twitch peak torque, respectively.  
143 In all sessions, the participant was required to rest for 10 min after arriving at the laboratory to

144 eliminate the effect of PAP induced by traveling to the laboratory. This rest period is sufficient to  
145 dissipate the effects of PAP [1,2]. The participants sat on a dynamometer (Biodex System 4; Sakai  
146 Medical Instrument, Tokyo, Japan) and were tightly secured to the seat using two crossover seatbelts  
147 and a waist harness. The lever arm of the dynamometer was attached 2–3 cm above the lateral  
148 malleolus with a strap. The rotation axis of the knee was aligned with the axis of the motor. The peak  
149 torque of voluntary knee extension and twitch contraction of the dynamometer was analog-to-digital  
150 converted (Power Lab/8SP; ADInstruments, Bella Vista, NSW, Australia) and stored on a personal  
151 computer software (LabChart 6 Japanese; ADInstruments). Data were filtered with a cut-off frequency  
152 of 12 Hz. In addition, MacIntosh et al. [22] indicated a possibility that the learning and familiarization  
153 effect of the performance task could affect PAPE. Therefore, in the present study, we conducted a  
154 task-specific warm-up session, based on the study by Seitz et al. [14], before each experimental session  
155 to eliminate the possibility of the learning and familiarization effect.

156

## 157 **Procedure**

### 158 **Classification of SI and WI**

159 To classify SI and WI, all participants performed a 10-s maximal voluntary isometric knee  
 160 extension exercise and were consistently encouraged to contract “as forcefully and as fast as possible.”  
 161 To observe the relationship between the muscle strength levels and the magnitude of PAP, a twitch  
 162 torque was induced by electrical stimulation before and immediately after a 10-s isometric knee  
 163 extension exercise. The extent of PAP induced by isometric knee extension exercise (%PAP<sub>MVC</sub>) was  
 164 calculated as follows:

$$165 \quad \%PAP_{MVC} = \frac{(T_{twpost-MVC} - T_{twpre-MVC})}{T_{twpre-MVC}} \times 100$$

166 where  $T_{twpre-MVC}$  and  $T_{twpost-MVC}$  are the maximal twitch torques obtained before and immediately  
 167 after the isometric knee extension exercise, respectively. From an initial sample of 22 men, 8  
 168 participants demonstrating the highest and 8 demonstrating the lowest relative muscle strength were  
 169 selected and classified as SI and WI, respectively. The other 6 participants were not classified into any  
 170 of the groups and did not participate in any further experiments.

171

## 172 **Electrical stimulation procedure**

173 To evoke quadriceps muscle twitches, an electrode pad consisting of a 10 × 20 cm aluminum

174 foil with an adhesive conductor (SR-4080; Minato Medical Science, Osaka, Japan) attached and  
175 covered with kitchen paper was prepared. Two electrode pads were wetted with water and attached to  
176 the upper and lower anterior thigh to cover the entire quadriceps muscle of the dominant leg. The  
177 participant was then placed on the dynamometer seat with the knee and hip joints fixed at 90° and 80°,  
178 respectively. The electrode pads were connected to a high-voltage constant-current stimulator (Model  
179 DS7AH; Digitimer Ltd, Hertfordshire, UK) via an output cable (D185-HB4; Digitimer Ltd,  
180 Hertfordshire, UK). The stimulus intensity was set at 120% of the maximal intensity [15,23].

181

## 182 **Task-specific warm-up sessions**

183 An overview of the task-specific warm-up session is shown in Fig 1A. After we determined  
184 the stimulation intensity, the participants performed two isokinetic knee extension exercises at 180°/s  
185 at 20%, 40%, 60%, and 80% of their perceived maximal torque at 45-s intervals. Isokinetic knee  
186 extensions at 100% of the maximal torque were then performed “as fast and as hard as possible” every  
187 minute until the peak torque production in three consecutive contractions differed by less than 2%.  
188 According to a previous study [14], the angular velocity of the performance test was set at 180°/s. In

189 addition, the range of motion of the knee was between 110° and 20° (0°, full extension) in concentric  
190 contractions. The participant performed a maximal isokinetic knee extension exercise over the entire  
191 range of motion until the dynamometer mechanically stopped.

192

### 193 **Fig 1. Experimental overview**

194 (A) Task-specific warm-up procedure (B) Experimental procedure for the 6-CA, 12-CA, and 18-CA  
195 protocols. (C) The details of the test protocol after each CA. CA, conditioning activity.

196

### 197 **Experimental session**

198 After the task-specific warm-up session, a 10-min rest period was provided before the  
199 experimental session. An overview of the experimental session and the posttest protocol are shown in  
200 Fig 1B and 1C, respectively. In the experimental session, the responses to one isometric twitch torque  
201 ( $Pre_{before}$ ) and two isokinetic knee extension exercises at 180°/s followed 5-s later by one isometric  
202 twitch ( $Pre_{after}$ ) were recorded before each participant performed each CA. The last stimulation was  
203 used to examine the possible potentiating effect of a set of two maximal isokinetic knee extensions at

204 180°/s. Following a rest period of approximately 90-s after Pre<sub>after</sub>, one of the three dynamic CAs with  
 205 different contraction durations (6-CA, 12-CA, or 18-CA) was performed. The posttest was completed  
 206 10 s (Post-10 s) and 1 (Post-1 min), 4 (Post-4 min), 7 (Post-7 min), and 10 (Post-10 min) min after  
 207 each CA (Fig 1B). The posttest protocol consisted of a single stimulation and two isokinetic knee  
 208 extension exercises at 180°/s (Fig 1C). The range of motion of the knee was the same as in the task-  
 209 specific warm-up session. The knee extension resulting in the highest voluntary peak torque at each  
 210 time point (i.e., Pre, Post-10 s, Post-1 min, Post-4 min, Post-7 min, and Post-10 min) was selected for  
 211 further analysis. After the first knee extension exercise, the lever arm of the dynamometer was  
 212 manually returned to the starting position (i.e., 110° of knee flexion) and then the second knee  
 213 extension exercise was performed. The extent of PAPE (%PAPE) was calculated as follows:

$$214 \quad \%PAPE = \{(T_{vol,post-CA} - T_{vol,pre-CA})/T_{vol,pre-CA}\} \times 100$$

215 where  $T_{vol,pre-CA}$  and  $T_{vol,post-CA}$  are the maximal knee extension torques during isokinetic knee  
 216 extension exercises before and after each CA, respectively. The extent of PAP measured in the  
 217 experimental session was expressed as %PAP. Among them, the %PAP observed in two maximal  
 218 knee extension exercises during the pretest was calculated as follows:



219 
$$\%PAP = \{(T_{tw.preafter-CA} - T_{tw.prebefore-CA})/T_{tw.prebefore-CA}\} \times 100$$

220 where  $T_{tw.prebefore-CA}$  and  $T_{tw.preafter-CA}$  are the maximal twitch torques induced before and after  
 221 the two isokinetic knee extension exercises during the pretest, respectively. Finally, the %PAP  
 222 observed after each CA was calculated as follows:

223 
$$\%PAP = \{(T_{tw.post-CA} - T_{tw.prebefore-CA})/T_{tw.prebefore-CA}\} \times 100$$

224 where  $T_{tw.post-CA}$  is the maximal twitch torque induced at each time point after each CA.

225

## 226 **CA protocols**

227 Based on a previous study by Seitz et al. [14], the dynamic CAs employed in this study were  
 228 isokinetic knee extension exercises at 60°/s. The numbers of contractions for 6-CA, 12-CA, and 18-  
 229 CA were 4, 8, and 12, respectively. The total contraction duration was calculated as follows:

230 
$$Total\ contraction\ duration = ROM/V_{CA} \times n$$

231 where  $ROM$  is the range of motion of the knee extensions performed during each CA (i.e., 90°),  $V_{CA}$   
 232 is the angular velocity of the knee extensions (i.e., 60°/s), and  $n$  is the number of knee extensions  
 233 performed during each CA.

234

235 **Statistical analysis**236 Descriptive data are presented as mean  $\pm$  standard deviation. A two-tailed, unpaired *t*-test237 was used for comparisons between the SI and WI groups. Pearson's correlation coefficients (*r*) were238 calculated and classified as small ( $0.1 \leq r < 0.3$ ), moderate ( $0.3 \leq r < 0.5$ ), and large ( $r \geq 0.5$ ). One-

239 way analysis of variance (ANOVA) with repeated measures was performed to compare the voluntary

240 knee extension torques produced during the last three knee extensions of the task-specific warm-up

241 session and during the pretest knee extension to determine whether the task-specific warm-up was

242 completed. For %PAP, a two-way ANOVA (time [Pre<sub>before</sub>, Pre<sub>after</sub>, Post-10 s, Post-1 min, Post-4 min,243 Post-7 min, Post-10 min]  $\times$  protocol [6-CA, 12-CA, 18-CA]) with repeated measures was used.

244 Similarly, for %PAPE, two-way ANOVA (time [Pre, Post-10 s, Post-1 min, Post-4 min, Post-7 min,

245 Post-10 min]  $\times$  protocol [6-CA, 12-CA, 18-CA]) with repeated measures was used. When a significant

246 interaction was found, the Bonferroni post-hoc test was used to examine the time-course changes in

247 each CA protocol. Effect sizes were estimated by calculating the partial eta-squared ( $\eta^2$ ) values (small:248 0.01–0.059, moderate: 0.06–0.137, and large:  $> 0.138$ ). For pairwise comparisons, effect size was

249 determined by Cohen's  $d$  (small:  $> 0.2$ , moderate:  $> 0.5$ , large:  $> 0.8$ ). Statistical analyses were  
250 performed using statistical software (SPSS Statistics 27; IBM Japan, Tokyo, Japan). The significance  
251 level for all comparisons was set at  $p < 0.05$ .

252

## 253 **Results**

### 254 **Comparison of SI and WI and the relationship between %**

### 255 **PAP<sub>MVC</sub> and muscle strength**

256 An unpaired  $t$ -test showed a significant difference between SI and WI in absolute ( $p < 0.001$   
257  $d = 2.427$ ) and relative ( $p < 0.001$ ,  $d = 3.434$ ) muscle strength. There was also a significant difference  
258 between SI and WI in %PAP<sub>MVC</sub> ( $p = 0.004$ ,  $d = 1.806$ ) (Table 1). A significant relationship was found  
259 between %PAP<sub>MVC</sub> and the absolute ( $r = 0.550$ ,  $p = 0.008$ ) and relative ( $r = 0.570$ ,  $p = 0.006$ ) muscle  
260 strength for all the participants (Fig 2).

261 **Table 1. Physical characteristics, MVC, twitch torque, and %PAPMVC in the whole group and**

262 **SI and WI subgroups**

|                                    | Whole (n = 22) | SI (n = 8)    | WI (n = 8)   |
|------------------------------------|----------------|---------------|--------------|
| Age (year)                         | 19.7 ± 1.2     | 19.9 ± 1.6    | 19.8 ± 1.0   |
| Training Age (year)                | 3.5 ± 1.2      | 3.5 ± 1.1     | 3.5 ± 1.7    |
| Height (m)                         | 171.5 ± 6.1    | 172.5 ± 6.5   | 169.1 ± 5.7  |
| Weight (kg)                        | 74.6 ± 10.6    | 72.3 ± 10.4   | 74.8 ± 13.2  |
| MVC (N·m)                          | 274.7 ± 68.2   | 337.6 ± 41.6* | 204.3 ± 37.3 |
| MVC/Weight (N·m·kg <sup>-1</sup> ) | 3.7 ± 0.9      | 4.7 ± 0.5*    | 2.4 ± 1.0    |
| pre-MVC (N·m)                      | 44.6 ± 8.9     | 43.7 ± 6.0    | 47.3 ± 9.4   |
| post-MVC (N·m)                     | 71.3 ± 10.6    | 75.3 ± 8.1    | 67.1 ± 12.9  |
| %PAP <sub>MVC</sub> (%)            | 63.2 ± 29.1    | 73.5 ± 11.2*  | 43.4 ± 22.4  |

263 Values are presented as means ± standard deviation. MVC, maximal voluntary contraction; pre-

264 MVC, twitch torque before MVC; post-MVC, twitch torque after MVC; SI, stronger individuals;

265 WI, weaker individuals. The statistical difference is set at  $p < 0.05$ : difference versus WI\*

266

267 **Fig 2. Correlation between %PAP<sub>MVC</sub> and absolute (A) and relative (B) muscle strength**

268 Filled squares, open squares, and open circles represent the weaker, stronger, and intermediate levels  
269 of the relative muscle strength, respectively

270

## 271 **Task-specific warm-up session**

272 In the task-specific warm-up session for each protocol, the numbers of knee extensions for  
273 6-CA, 12-CA, and 18-CA were  $4.4 \pm 1.7$ ,  $4.9 \pm 2.7$ , and  $8.6 \pm 4.8$  for SI, and  $7.0 \pm 4.6$ ,  $7.3 \pm 4.8$ , and  
274  $7.8 \pm 1.4$  for WI, respectively. Fig 3 shows no significant difference between the maximal voluntary  
275 knee extension torque during the last three knee extensions in the task-specific warm-up session and  
276 the maximal voluntary knee extension torque during the pretest in each CA protocol. The fact that no  
277 significant difference was observed between the knee extension torques in the condition in which  
278 sufficient practice was conducted and in the pretest indicates that the task-specific warm-up session  
279 was sufficiently completed before conducting each CA and the effects of learning and familiarization  
280 on PAPE were minimized.

281

282 **Fig 3. The task-specific warm-up session was adequately performed**

283 Maximal voluntary knee extension torques produced during the last three knee extensions at the task-  
284 specific warm-up session (warm-up 1, warm-up 2, and warm-up 3) and the knee extension during the  
285 pretest for (A) stronger individuals (SI) and (B) weaker individuals (WI). CA, conditioning activity.

286

## 287 **Twitch torque**

288 For the twitch torque, the two-way ANOVA revealed that the time  $\times$  protocol interaction  
289 was significant for SI ( $p < 0.001$ ,  $\eta^2 = 0.404$ ). Further analyses showed that in all protocols, the peak  
290 twitch torque after a set of two isokinetic knee extensions ( $Pre_{after}$ ) was significantly potentiated (6-  
291 CA,  $15.7\% \pm 6.3\%$ ,  $p = 0.004$ ,  $d = 1.068$ , 95% confidence interval (CI): 10.4–21.0; 12-CA,  $14.1\% \pm$   
292  $8.4\%$ ,  $p = 0.045$ ,  $d = 0.417$ , 95% CI: 7.0–21.2; 18-CA,  $11.7\% \pm 3.6\%$ ,  $p = 0.001$ ,  $d = 1.263$ , 95% CI:  
293 8.7–14.7), indicating that two isokinetic knee extensions induce PAP. Moreover, for only 6-CA, the  
294 values of Post-10 s ( $29.5\% \pm 9.3\%$ ,  $p = 0.001$ ,  $d = 1.714$ , 95% CI: 21.7–37.3) and Post-1 min ( $18.5\%$   
295  $\pm 6.8\%$ ,  $p = 0.003$ ,  $d = 1.101$ , 95% CI: 14.8–24.2) were significantly higher than the  $Pre_{before}$  value  
296 (Fig 4A). Fig 4B shows the significant interaction effect for the twitch torques for WI ( $p < 0.001$ ,  $\eta^2 =$   
297 0.369). However, further analyses revealed no significant difference between the baseline value

298 (Pre<sub>before</sub>) and the values at the other time periods for each CA protocol.

299

300 **Fig 4. Time-course changes in %PAP after each CA for (A) stronger individuals (SI) and (B)**

301 **weaker individuals (WI)**

302 CA, conditioning activity. Values are presented as means  $\pm$  standard deviation. The statistical

303 difference is set at  $p < 0.05$ : difference from Pre<sub>before</sub> in 6-CA\*, 12-CA<sup>†</sup>, and 18-CA<sup>§</sup>.

304

## 305 **Voluntary knee extension torque**

306 Fig 5A shows the significant interaction effect for %PAPE for SI ( $p < 0.001$ ,  $\eta^2 = 0.377$ ).

307 For the 18-CA protocol, further analyses revealed that the values of Post-4 min ( $7.0\% \pm 4.5\%$ ,  $p =$

308  $0.047$ ,  $d = 0.494$ , 95% CI: 3.2–10.7) and Post-7 min ( $8.2\% \pm 4.3\%$ ,  $p = 0.016$ ,  $d = 0.568$ , 95% CI: 4.6–

309 11.8) were significantly higher than the baseline value (Pre). In contrast, there was no significant

310 interaction for %PAPE for WI ( $p = 0.057$ ,  $\eta^2 = 0.215$ ). In addition, the results of %PAPE for each

311 participant after each CA protocol are shown in Fig 6.

312

313 **Fig 5. Time-course changes in %PAPE after each CA for (A) stronger individuals (SI) and (B)**

314 **weaker individuals (WI)**

315 CA, conditioning activity. Values are means  $\pm$  standard deviation. The statistical difference is set at  $p$

316  $< 0.05$ : difference from Pre in 18-CA<sup>§</sup>

317 **Fig 6. Time-course changes in %PAPE after each CA for each individual**

318 The number in parentheses indicates how high the individual's relative muscle strength was from the

319 top among all participants. SI, stronger individuals; WI, weaker individuals; CA, conditioning activity

320

## 321 **Discussion**

322 This study aimed to determine whether the optimal contraction duration of a CA to

323 maximize PAPE differs among athletes with different muscle strength levels. The results obtained in

324 the present study suggest that the strategies for maximizing PAPE may differ depending on the

325 strength level of an individual.

326 In the present study, we observed that SI improved the voluntary performance only in the

327 18-CA protocol (Fig 5A), and when the results of PAPE were examined for each individual, most



328 participants (i.e., individuals numbered 1, 3, 4, 5, 6, and 8) enhanced their voluntary performance after  
329 the 18-CA protocol more than after the other two protocols (Fig 6). These facts suggest that the CA  
330 with a relatively long contraction duration was optimal for SI. However, it should be noted that PAP  
331 had already disappeared at the time when PAPE was observed in the 18-CA protocol (i.e., Post-4 min,  
332 Post-7 min; Fig 4A), which indicates that PAP was not involved in the mechanism of PAPE in the 18-  
333 CA protocol. Previous studies have also confirmed the presence of PAPE when PAP has already  
334 disappeared [24,25]. Prieske et al. [24] reported that the jump performance was significantly improved  
335 after the CA, but PAP was not observed at that time and concluded that PAP was not directly linked  
336 to the voluntary performance enhancements after the CA. Moreover, Thomas et al. [25] observed a  
337 significant increase in the countermovement jump height 8 min after performing the squat exercise,  
338 but PAP was no longer present at that time. Blazeovich et al. [26] indicated that factors other than PAP,  
339 such as an increase in the muscle temperature, a change in the central drive capacity, and the learning  
340 and familiarization effect, may contribute to acute voluntary performance enhancements. De Ruiter  
341 and De Haan [27] reported that parameters such as the maximal power production improved as muscle  
342 temperature increased. Therefore, it is possible that increasing the muscle temperature associated with

343 a CA would temporally enhance the subsequent voluntary performance. Furthermore, González-  
344 Alonso et al. [28] showed that the quadriceps muscle temperature continued to increase during a 3 min  
345 voluntary knee extension exercise. Based on this study, it is likely that the 18-CA protocol, which had  
346 the longest total contraction duration, increased the muscle temperature more than that observed with  
347 the other two protocols. Therefore, the fact that PAPE was observed only in the 18-CA protocol for  
348 SI may have been related to the difference in the degree of increase in the muscle temperature. In  
349 addition, Folland et al. [29] confirmed that the H-wave amplitude, normalized by the maximal  
350 amplitude of the M-wave, increased 5–11 min after the isometric knee extension exercise. This result  
351 indicates that a CA has the potential to increase the excitability of the motoneuron pool. Therefore, in  
352 the present study, it is possible that the CA increased the excitability at the spinal level, resulting in  
353 the increased recruitment of higher-order motor units. Furthermore, MacIntosh et al. [22] referred to  
354 the possibility that the learning and familiarization effects regarding the task performance could affect  
355 the acute enhancement of the voluntary performance. However, in the present study, the participants  
356 completed the task-specific warm-up session to the point where no further improvement in the  
357 voluntary knee extension torque production could be achieved. Thus, it is unlikely that the learning

358 and familiarization effects on task performance influenced the PAPE in this study. Collectively, factors  
359 other than PAP and the learning and familiarization effects, such as the increase in the muscle  
360 temperature and change in the central drive capacity, may be involved in the improvement of the  
361 voluntary knee extension performance observed in the 18-CA protocol for SI. However, since these  
362 factors were not investigated in our study, we cannot conclude whether these factors were involved in  
363 the potentiation of the knee extension performance in the 18-CA protocol for SI.

364           We should note why SI was unable to improve the voluntary performance in the condition  
365 in which PAP was present in the 6-CA protocol (i.e., Post-10 s, Post-1 min, Fig 4A and Fig 5A). The  
366 finding regarding the absence of the potentiation of the voluntary performance despite the occurrence  
367 of the maximal twitch potentiation has been confirmed in other studies. Fukutani et al. [23] researched  
368 the effect of a 6-s isometric ankle plantar flexion exercise on PAP and PAPE and found that isometric  
369 twitch torque and isokinetic voluntary plantar flexion torque at 180°/s significantly increased by 62.7%  
370 and 6.4%, respectively, immediately after the CA. However, 1 min after the CA, although PAP  
371 remained significantly higher than that at baseline, its potentiation effect decreased to 30.3%, and the  
372 voluntary performance was no longer significantly different from that at baseline. Importantly,

373 sensitivity to the potentiation effect of a CA differs between the twitch torque and maximal voluntary  
374 torque [4]. The  $\text{Ca}^{2+}$  concentration is much higher in the maximal voluntary concentric contraction  
375 (multiple impulses) than in the twitch contraction (single impulse). In addition, the extent of increase  
376 in the torque by a CA becomes smaller when the  $\text{Ca}^{2+}$  concentration is higher because, in this case,  
377 several cross-bridge attachments already exist [30]. In this context, Zimmermann et al. [31] noted that  
378 PAP must be extremely high to contribute to an increase in voluntary performance. Therefore, it is  
379 reasonable to conclude that the potentiation effect observed after 6-CA was insufficient to enhance the  
380 voluntary performance to the point where a statistical difference could be observed. Nevertheless, a  
381 previous study by Seitz et al. [14] confirmed that isokinetic knee extension exercises at  $60^\circ/\text{s}$  with a  
382 6-s total contraction duration improved the maximal knee extension torque at  $180^\circ/\text{s}$  after the CA. The  
383 reason for this discrepancy may be the difference in the resistance training experience of the  
384 participants, which can affect the degree of PAPE [21]. The average age and resistance training  
385 experience of the SI group in the present study were  $19.9 \pm 1.6$  and  $3.5 \pm 1.1$  years, respectively (Table  
386 1), while the average age of the participants in the Seitz et al. [14] study was  $25.4 \pm 3.9$  years. Although  
387 their study did not state the years of resistance training experience, it can be presumed that the

388 participants in their study had a longer resistance training history than those in the present study, which  
389 could explain the inconsistent results.

390           In contrast to SI, WI failed to display PAPE in any of the CAs (Fig 5B), and thus, we could  
391 not conclude whether the CAs performed with relatively short or long total contraction durations were  
392 optimal for WI. The fact that PAPE was observed in SI but not in WI after the 18-CA protocol may  
393 be due to the difference in the fatigue resistance against a high-intensity exercise. Miyamoto et al. [17]  
394 confirmed that after a 5-s maximal isometric knee extension exercise, the dynamic maximal knee  
395 extension torque increased 1 to 3 min later but not immediately after the CA. Interestingly, however,  
396 after 12 weeks of high-intensity resistance training, the potentiation effect of the voluntary  
397 performance was observed even immediately after the CA. The main reason for the earlier realization  
398 of PAPE after the intervention is that the individuals developed resistance to fatigue by chronic high-  
399 intensity resistance training, suppressing the remarkable fatigue associated with a high-intensity CA.  
400 In other words, this result means that the participants with higher muscle strength levels have a greater  
401 fatigue resistance to a high-intensity CA, and there is a high possibility that WI had a lower fatigue  
402 resistance to a high-intensity CA than that of SI in the present study. Therefore, it is likely that the

403 significant fatigue associated with the CA was responsible for the lack of the potentiation of the  
404 voluntary performance in the 18-CA protocol for WI. In addition, contrary to our hypothesis, WI failed  
405 to enhance the voluntary performance after the CA with a relatively short total contraction duration  
406 (i.e., 6-CA). However, based on the individual data, we observed that for some participants (i.e.,  
407 individuals numbered 15, 21, and 22), the CAs performed with short or moderate total contraction  
408 durations were suitable for maximizing PAPE (Fig 6). In comparison to a high-intensity CA with a  
409 relatively long contraction duration, a high-intensity CA with short or moderate total contraction  
410 duration may produce less fatigue and allow the potentiating effect to dominate even in WI with a  
411 relatively low fatigue resistance. Future studies should continue to investigate the optimal long total  
412 contraction duration required for WI to maximize PAPE. Furthermore, the enhancement in the  
413 maximal twitch torque was also absent in all protocols for WI. Hamada et al. [1] discovered that the  
414 magnitude of PAP depends on the muscle fiber type distribution, and participants with larger fast-  
415 twitch fibers evoked higher PAP. Considering that SI tend to have higher fast-twitch fiber content  
416 [19,20], they can trigger higher PAP through CA implementation. Fig 2 indicates that the higher the  
417 relative muscle strength, the larger the magnitude of PAP. Therefore, it is possible that the WI group,

418 composed of participants with low muscle strength levels, did not significantly increase PAP due to  
419 the reduced number of fast-twitch fibers.

420           The present study has some limitations. First, the sample size of the SI and WI subgroups  
421 was small, and the participants with intermediate levels of relative muscle strength were not included  
422 in the subgroups to clearly distinguish the differences in muscle strength levels among the  
423 participants. A study with a larger sample size is necessary to confirm the present findings. Second,  
424 the athletic characteristics of the American football players who participated in this study may have  
425 influenced the results of this study. Specifically, since most of the game time in American football  
426 consists of intermittent high-intensity exercise, the participants in this study could have had higher  
427 fast-twitch fiber content, which is associated with the degree of PAP, than that of the athletes who  
428 require more endurance capacity (e.g., long-distance runners). Therefore, further studies should be  
429 conducted to determine whether similar results can be obtained in athletes with a high endurance  
430 capacity. Third, because the nature of isokinetic actions is different from that of isotonic actions, it  
431 may be difficult to directly apply the results to movements in sports and training. Further studies  
432 using isotonic exercise are required to apply the results of this study to the field. Fourth, the

433 measures related to PAPE mechanisms that could help explain the mechanisms of the increase in  
434 voluntary performance observed after the 18-CA protocol, such as the central drive capacity, muscle  
435 temperature, and water content [26], were not examined in this study. Future studies should include  
436 these measures after a high-intensity CA with a long contraction duration. Lastly, the experimental  
437 conditions employed in this study did not allow us to determine whether the CAs performed with  
438 relatively short or long contraction durations are optimal for individuals with low muscle strength  
439 levels. Therefore, we hope that future studies with modification to the experimental conditions of  
440 this study (e.g., muscle contraction types, total contraction durations) will be conducted.

441

## 442 **Conclusion**

443         The present study revealed that SI were able to enhance the voluntary performance only  
444 after the CA with a long contraction duration (i.e., 18-CA), whereas WI could not enhance the  
445 voluntary performance in all the CAs. The findings suggest that the CA with a relatively long  
446 contraction duration is optimal for maximizing PAPE in individuals with a high muscle strength. In  
447 contrast, we could not conclude whether the CAs performed with relatively short or long contraction



448 durations are optimal for individuals with a low muscle strength. Based on the results of this study, it  
449 is suggested that coaches need to determine the strategies to maximize PAPE while considering the  
450 individual's strength levels. Specifically, athletes with high relative muscle strength levels may likely  
451 prefer to select a CA performed with a relatively long contraction duration to induce the potentiation  
452 of the voluntary performance sufficiently. However, in this case, as PAP is not expected to be a  
453 primary mechanism for improving voluntary performance, CA focused on enhancing PAP may not  
454 always be effective to maximize PAPE. In contrast, athletes with a low relative muscle strength may  
455 need to complete chronic high-intensity resistance training as a first step to utilize PAPE. This may  
456 lead to the enhancement of fatigue resistance against high-intensity exercise, which is thought to  
457 contribute to the realization of PAPE. To improve the practical use of the current study, future studies  
458 should examine whether the results observed in this study are also observed when isotonic exercises  
459 are employed.

460

## 461 **Acknowledgments**

462 The authors would like to thank all participants for their cooperation and Editage ([www.editage.jp](http://www.editage.jp))

463 for the English language review.

464

## 465 **References**

- 466 1. Hamada T, Sale DG, MacDougall JD, Tarnopolsky MA. Postactivation potentiation, fiber type,  
467 and twitch contraction time in human knee extensor muscles. *J Appl Physiol* (1985). 2000;88:  
468 2131-2137. doi: [10.1152/jappl.2000.88.6.2131](https://doi.org/10.1152/jappl.2000.88.6.2131).
- 469 2. Vandervoort AA, Quinlan J, McComas AJ. Twitch potentiation after voluntary contraction. *Exp*  
470 *Neurol*. 1983;81: 141-152. doi: [10.1016/0014-4886\(83\)90163-2](https://doi.org/10.1016/0014-4886(83)90163-2).
- 471 3. Moore RL, Stull JT. Myosin light chain phosphorylation in fast and slow skeletal muscles in situ.  
472 *Am J Physiol*. 1984;247: C462-C471. doi: [10.1152/ajpcell.1984.247.5.C462](https://doi.org/10.1152/ajpcell.1984.247.5.C462).
- 473 4. Sweeney HL, Bowman BF, Stull JT. Myosin light chain phosphorylation in vertebrate striated  
474 muscle: regulation and function. *Am J Physiol*. 1993;264: C1085-C1095. doi:  
475 [10.1152/ajpcell.1993.264.5.C1085](https://doi.org/10.1152/ajpcell.1993.264.5.C1085).
- 476 5. Szczesna D. Regulatory light chains of striated muscle myosin. Structure, function and  
477 malfunction. *Curr Drug Targets Cardiovasc Haematol Disord*. 2003;3: 187-197. doi:  
478 [10.2174/1568006033481474](https://doi.org/10.2174/1568006033481474).
- 479 6. Tillin NA, Bishop D. Factors modulating post-activation potentiation and its effect on

- 480 performance of subsequent explosive activities. Sports Med. 2009;39: 147-166. doi:  
481 [10.2165/00007256-200939020-00004](https://doi.org/10.2165/00007256-200939020-00004).
- 482 7. Baudry S, Duchateau J. Postactivation potentiation in a human muscle: effect on the load-velocity  
483 relation of tetanic and voluntary shortening contractions. J Appl Physiol (1985). 2007;103: 1318-  
484 1325. doi: [10.1152/jappphysiol.00403.2007](https://doi.org/10.1152/jappphysiol.00403.2007).
- 485 8. Bergmann J, Kramer A, Gruber M. Repetitive hops induce postactivation potentiation in triceps  
486 surae as well as an increase in the jump height of subsequent maximal drop jumps. PLOS ONE.  
487 2013;8: e77705. doi: [10.1371/journal.pone.0077705](https://doi.org/10.1371/journal.pone.0077705).
- 488 9. Fukutani A, Takei S, Hirata K, Miyamoto N, Kanehisa H, Kawakami Y. Influence of the intensity  
489 of squat exercises on the subsequent jump performance. J Strength Cond Res. 2014;28: 2236-  
490 2243. doi: [10.1519/JSC.0000000000000409](https://doi.org/10.1519/JSC.0000000000000409).
- 491 10. Mitchell CJ, Sale DG. Enhancement of jump performance after a 5-RM squat is associated with  
492 postactivation potentiation. Eur J Appl Physiol. 2011;111: 1957-1963. doi: [10.1007/s00421-010-](https://doi.org/10.1007/s00421-010-1823-x)  
493 [1823-x](https://doi.org/10.1007/s00421-010-1823-x).
- 494 11. Miyamoto N, Kanehisa H, Fukunaga T, Kawakami Y. Effect of postactivation potentiation on

- 495 the maximal voluntary isokinetic concentric torque in humans. *J Strength Cond Res.* 2011;25:  
496 186-192. doi: [10.1519/JSC.0b013e3181b62c1d](https://doi.org/10.1519/JSC.0b013e3181b62c1d).
- 497 12. Cuenca-Fernández F, Smith IC, Jordan MJ, MacIntosh BR, López-Contreras G, Arellano R, et  
498 al. Nonlocalized postactivation performance enhancement (PAPE) effects in trained athletes: a  
499 pilot study. *Appl Physiol Nutr Metab.* 2017;42: 1122-1125. doi: [10.1139/apnm-2017-0217](https://doi.org/10.1139/apnm-2017-0217).
- 500 13. Rassier DE, Macintosh BR. Coexistence of potentiation and fatigue in skeletal muscle. *Braz J*  
501 *Med Biol Res.* 2000;33: 499-508. doi: [10.1590/s0100-879x2000000500003](https://doi.org/10.1590/s0100-879x2000000500003).
- 502 14. Seitz LB, Trajano GS, Dal Maso F, Haff GG, Blazevich AJ. Postactivation potentiation during  
503 voluntary contractions after continued knee extensor task-specific practice. *Appl Physiol Nutr*  
504 *Metab.* 2015;40: 230-237. doi: [10.1139/apnm-2014-0377](https://doi.org/10.1139/apnm-2014-0377).
- 505 15. Hamada T, Sale DG, MacDougall JD, Tarnopolsky MA. Interaction of fibre type, potentiation  
506 and fatigue in human knee extensor muscles. *Acta Physiol Scand.* 2003;178: 165-173. doi:  
507 [10.1046/j.1365-201X.2003.01121.x](https://doi.org/10.1046/j.1365-201X.2003.01121.x).
- 508 16. Jo E, Judelson DA, Brown LE, Coburn JW, Dabbs NC. Influence of recovery duration after a  
509 potentiating stimulus on muscular power in recreationally trained individuals. *J Strength Cond*

- 510 Res. 2010;24: 343-347. doi: [10.1519/JSC.0b013e3181cc22a4](https://doi.org/10.1519/JSC.0b013e3181cc22a4).
- 511 17. Miyamoto N, Wakahara T, Ema R, Kawakami Y. Further potentiation of dynamic muscle  
512 strength after resistance training. *Med Sci Sports Exerc.* 2013;45: 1323-1330. doi:  
513 [10.1249/MSS.0b013e3182874c0e](https://doi.org/10.1249/MSS.0b013e3182874c0e).
- 514 18. Seitz LB, de Villarreal ES, Haff GG. The temporal profile of postactivation potentiation is related  
515 to strength level. *J Strength Cond Res.* 2014;28: 706-715. doi: [10.1519/JSC.0b013e3182a73ea3](https://doi.org/10.1519/JSC.0b013e3182a73ea3).
- 516 19. Aagaard P, Andersen JL. Correlation between contractile strength and myosin heavy chain  
517 isoform composition in human skeletal muscle. *Med Sci Sports Exerc.* 1998;30: 1217-1222. doi:  
518 [10.1097/00005768-199808000-00006](https://doi.org/10.1097/00005768-199808000-00006).
- 519 20. Maughan RJ, Watson JS, Weir J. Relationships between muscle strength and muscle cross-  
520 sectional area in male sprinters and endurance runners. *Eur J Appl Physiol Occup Physiol.*  
521 1983;50: 309-318. doi: [10.1007/BF00423237](https://doi.org/10.1007/BF00423237).
- 522 21. Seitz LB, Haff GG. Factors modulating post-activation potentiation of jump, sprint, throw, and  
523 upper-body ballistic performances: A systematic review with meta-analysis. *Sports Med.*  
524 2016;46: 231-240. doi: [10.1007/s40279-015-0415-7](https://doi.org/10.1007/s40279-015-0415-7).

- 525 22. Macintosh BR, Robillard ME, Tomaras EK. Should postactivation potentiation be the goal of  
526 your warm-up? *Appl Physiol Nutr Metab.* 2012;37: 546-550. doi: [10.1139/h2012-016](https://doi.org/10.1139/h2012-016).
- 527 23. Fukutani A, Miyamoto N, Kanehisa H, Yanai T, Kawakami Y. Potentiation of isokinetic torque  
528 is velocity-dependent following an isometric conditioning contraction. *Springerplus.* 2013;2: 554.  
529 doi: [10.1186/2193-1801-2-554](https://doi.org/10.1186/2193-1801-2-554).
- 530 24. Prieske O, Maffiuletti NA, Granacher U. Postactivation potentiation of the plantar flexors does  
531 not directly translate to jump performance in female elite young soccer players. *Front Physiol.*  
532 2018;9: 276. doi: [10.3389/fphys.2018.00276](https://doi.org/10.3389/fphys.2018.00276).
- 533 25. Thomas K, Toward A, West DJ, Howatson G, Goodall S. Heavy-resistance exercise-induced  
534 increases in jump performance are not explained by changes in neuromuscular function. *Scand J*  
535 *Med Sci Sports.* 2017;27:35-44. doi: [10.1111/sms.12626](https://doi.org/10.1111/sms.12626)
- 536 26. Blazevich AJ, Babault N. Post-activation potentiation versus post-activation performance  
537 enhancement in humans: historical perspective, underlying mechanisms, and current issues. *Front*  
538 *Physiol.* 2019;10: 1359. doi: [10.3389/fphys.2019.01359](https://doi.org/10.3389/fphys.2019.01359).
- 539 27. De Ruijter CJ, De Haan A. Temperature effect on the force/velocity relationship of the fresh and

- 540 fatigued human adductor pollicis muscle. *Pflügers Arch.* 2000;440: 163-170. doi:  
541 [10.1007/s004240000284](https://doi.org/10.1007/s004240000284).
- 542 28. González-Alonso J, Quistorff B, Krstrup P, Bangsbo J, Saltin B. Heat production in human  
543 skeletal muscle at the onset of intense dynamic exercise. *J Physiol.* 2000;524: 603-615. doi:  
544 [10.1111/j.1469-7793.2000.00603.x](https://doi.org/10.1111/j.1469-7793.2000.00603.x).
- 545 29. Folland JP, Wakamatsu T, Fimland MS. The influence of maximal isometric activity on twitch  
546 and H-reflex potentiation, and quadriceps femoris performance. *Eur J Appl Physiol.* 2008;104:  
547 739-748. doi: [10.1007/s00421-008-0823-6](https://doi.org/10.1007/s00421-008-0823-6).
- 548 30. Persechini A, Stull JT, Cooke R. The effect of myosin phosphorylation on the contractile  
549 properties of skinned rabbit skeletal muscle fibers. *J Biol Chem.* 1985;260: 7951-7954. doi:  
550 [10.1016/S0021-9258\(17\)39544-3](https://doi.org/10.1016/S0021-9258(17)39544-3).
- 551 31. Zimmermann HB, MacIntosh BR, Dal Pupo J. Does postactivation potentiation (PAP) increase  
552 voluntary performance? *Appl Physiol Nutr Metab.* 2020;45: 349-356. doi: [10.1139/apnm-2019-](https://doi.org/10.1139/apnm-2019-0406)  
553 [0406](https://doi.org/10.1139/apnm-2019-0406).





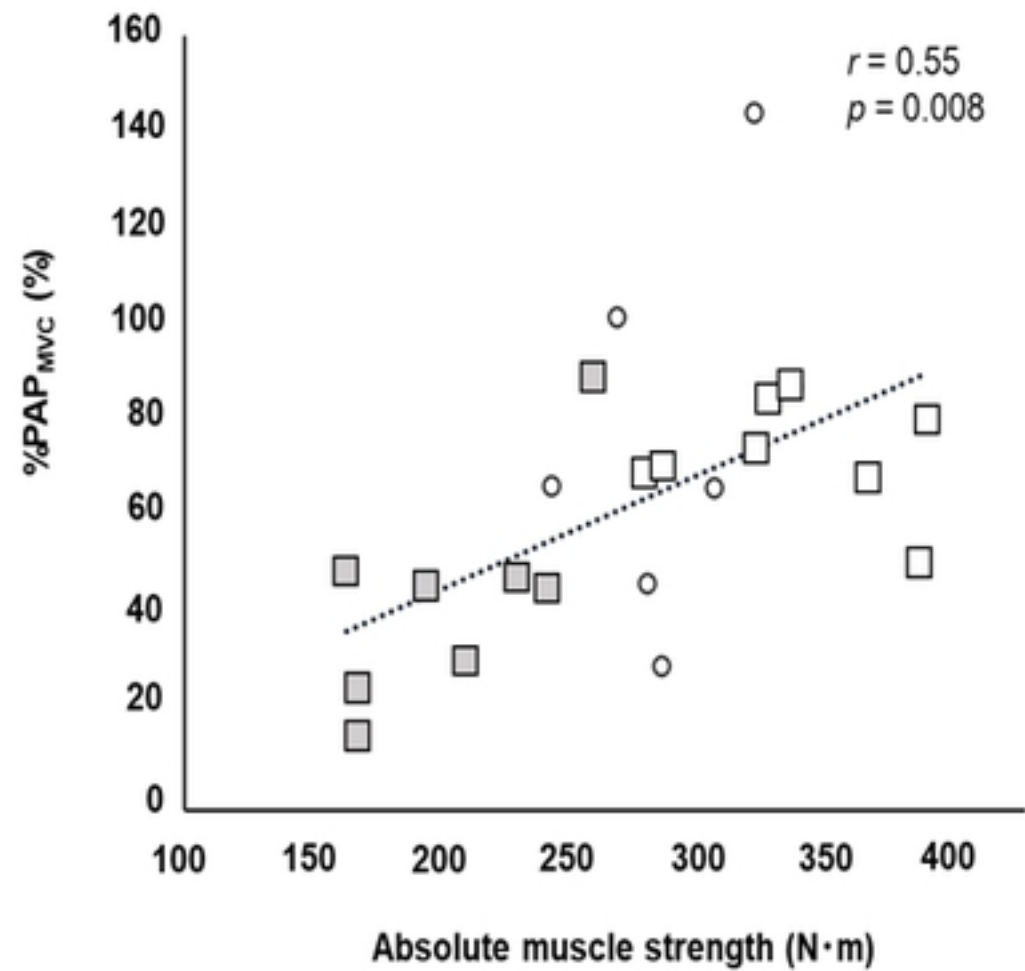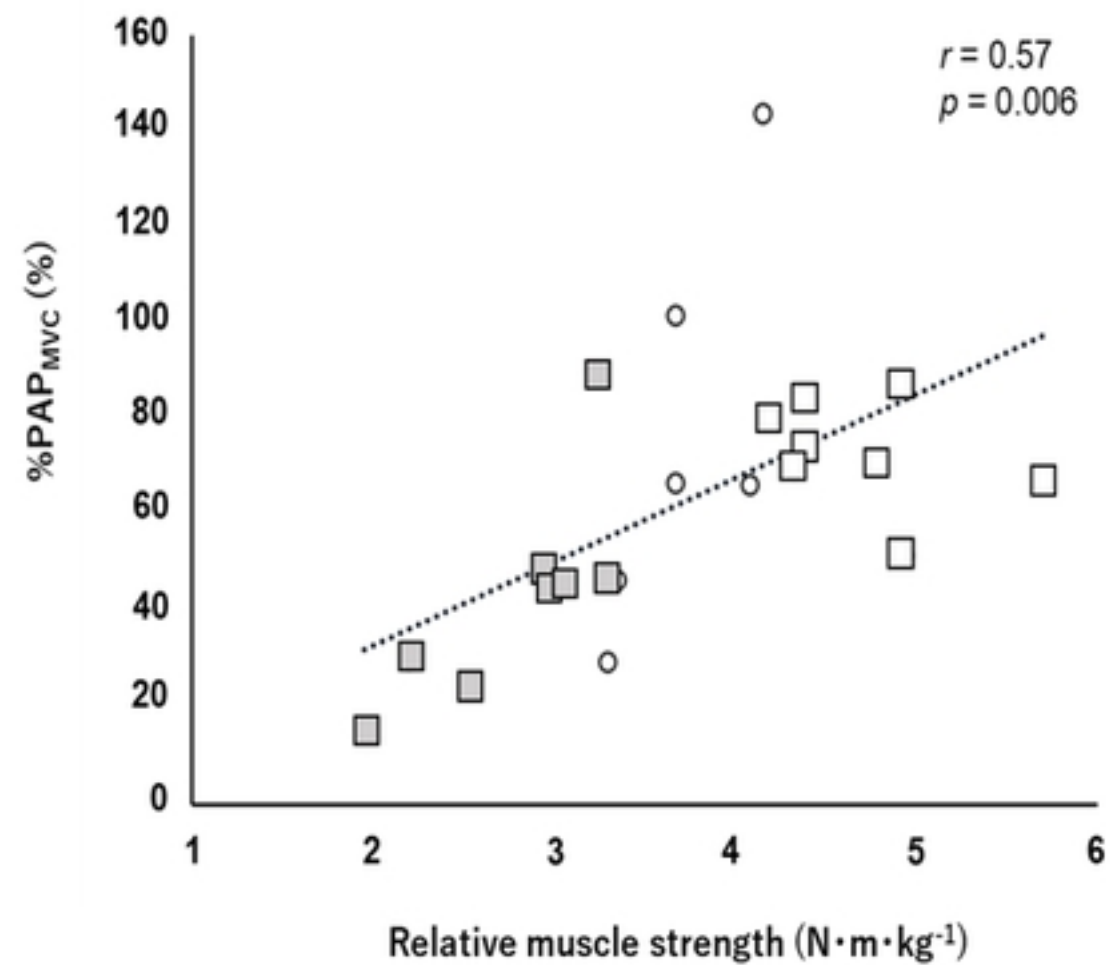

Fig 2

**A**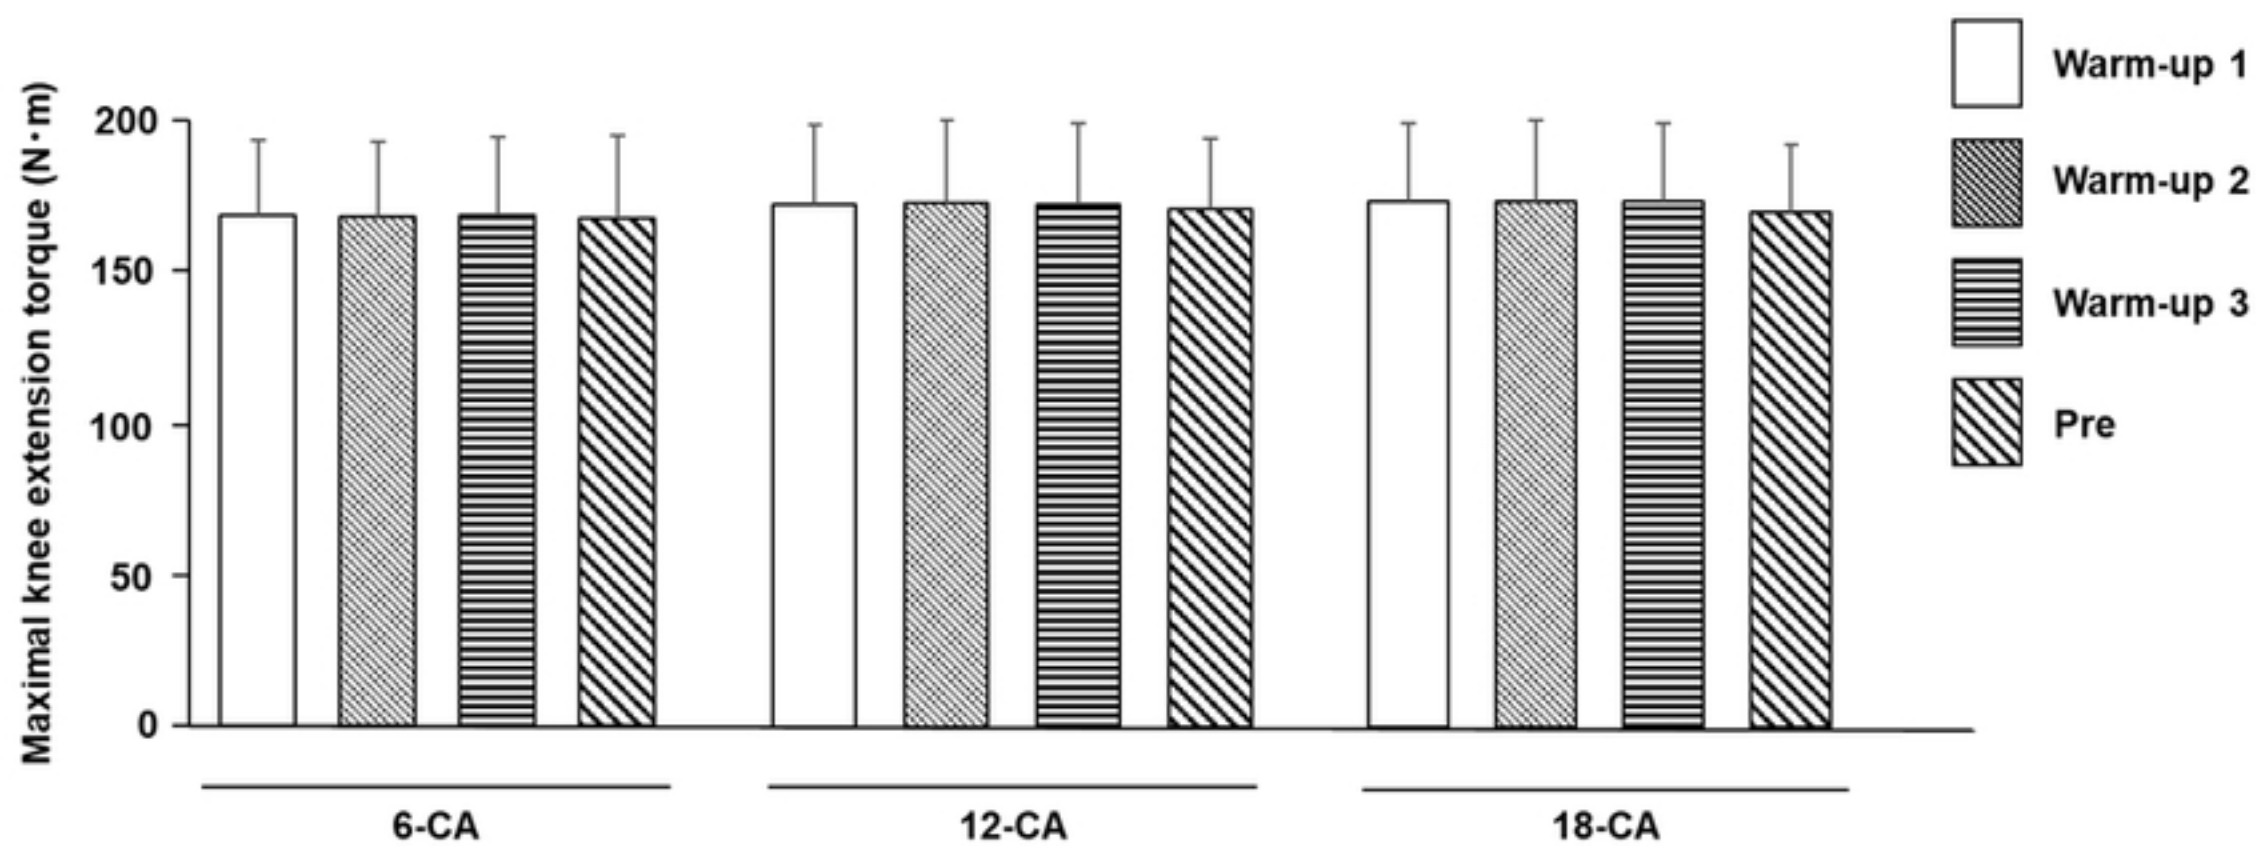**B**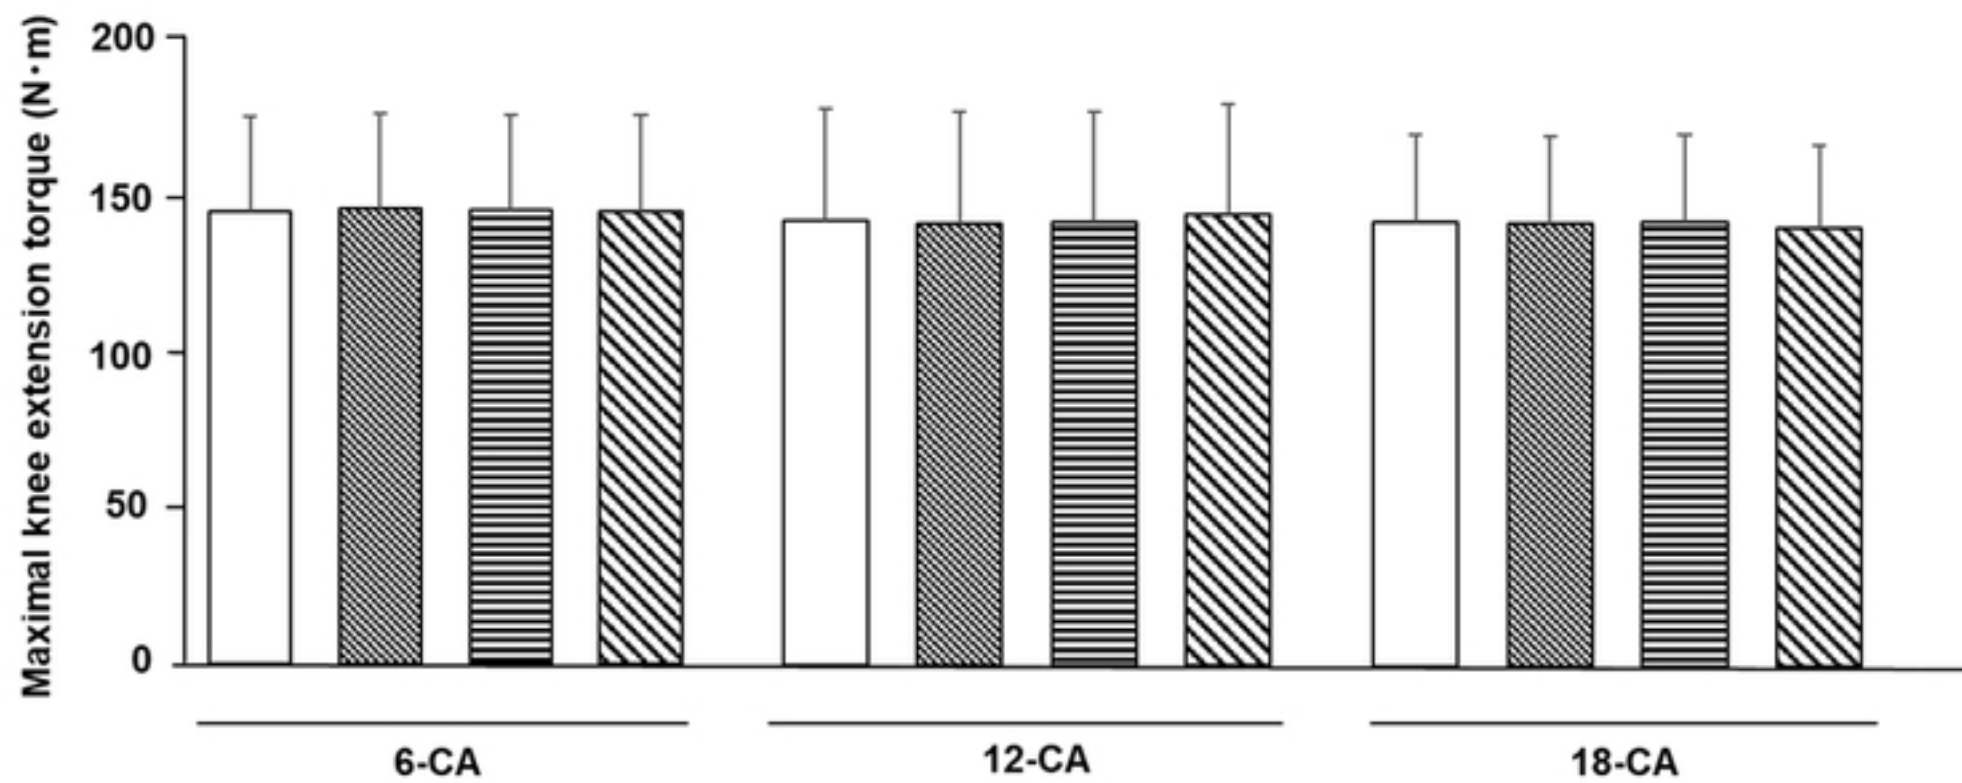**Fig 3**

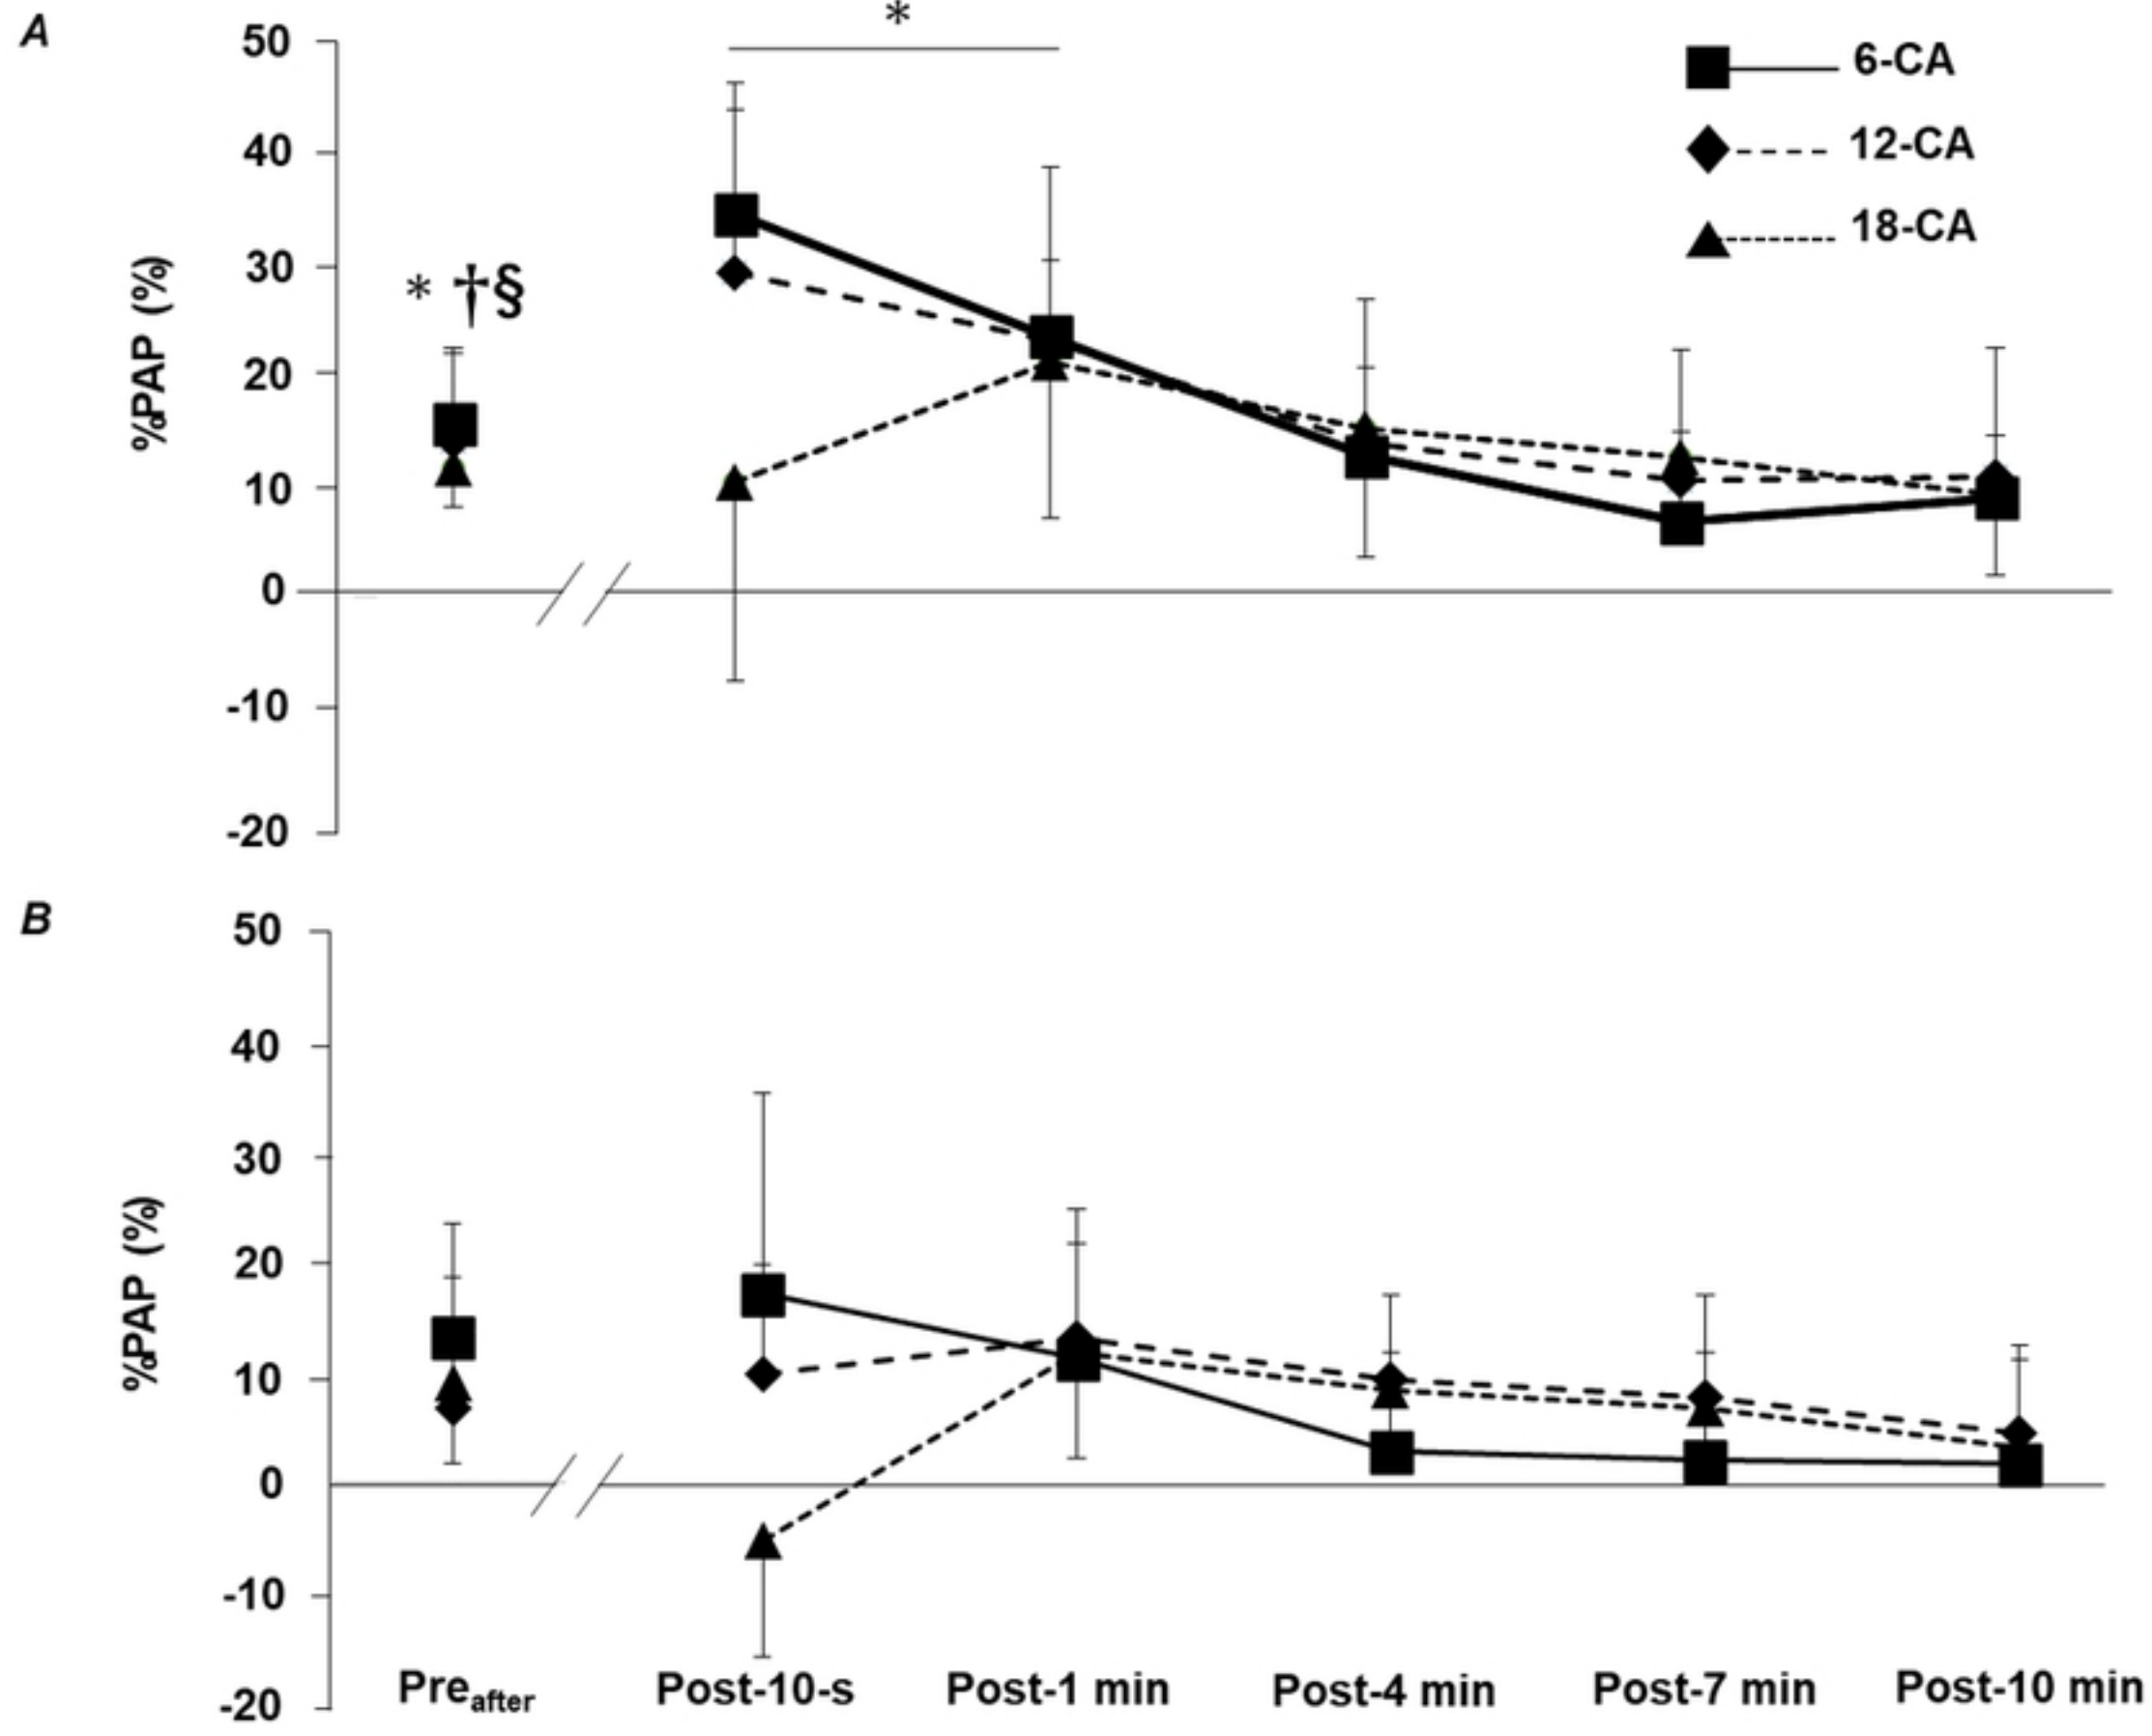

Fig 4

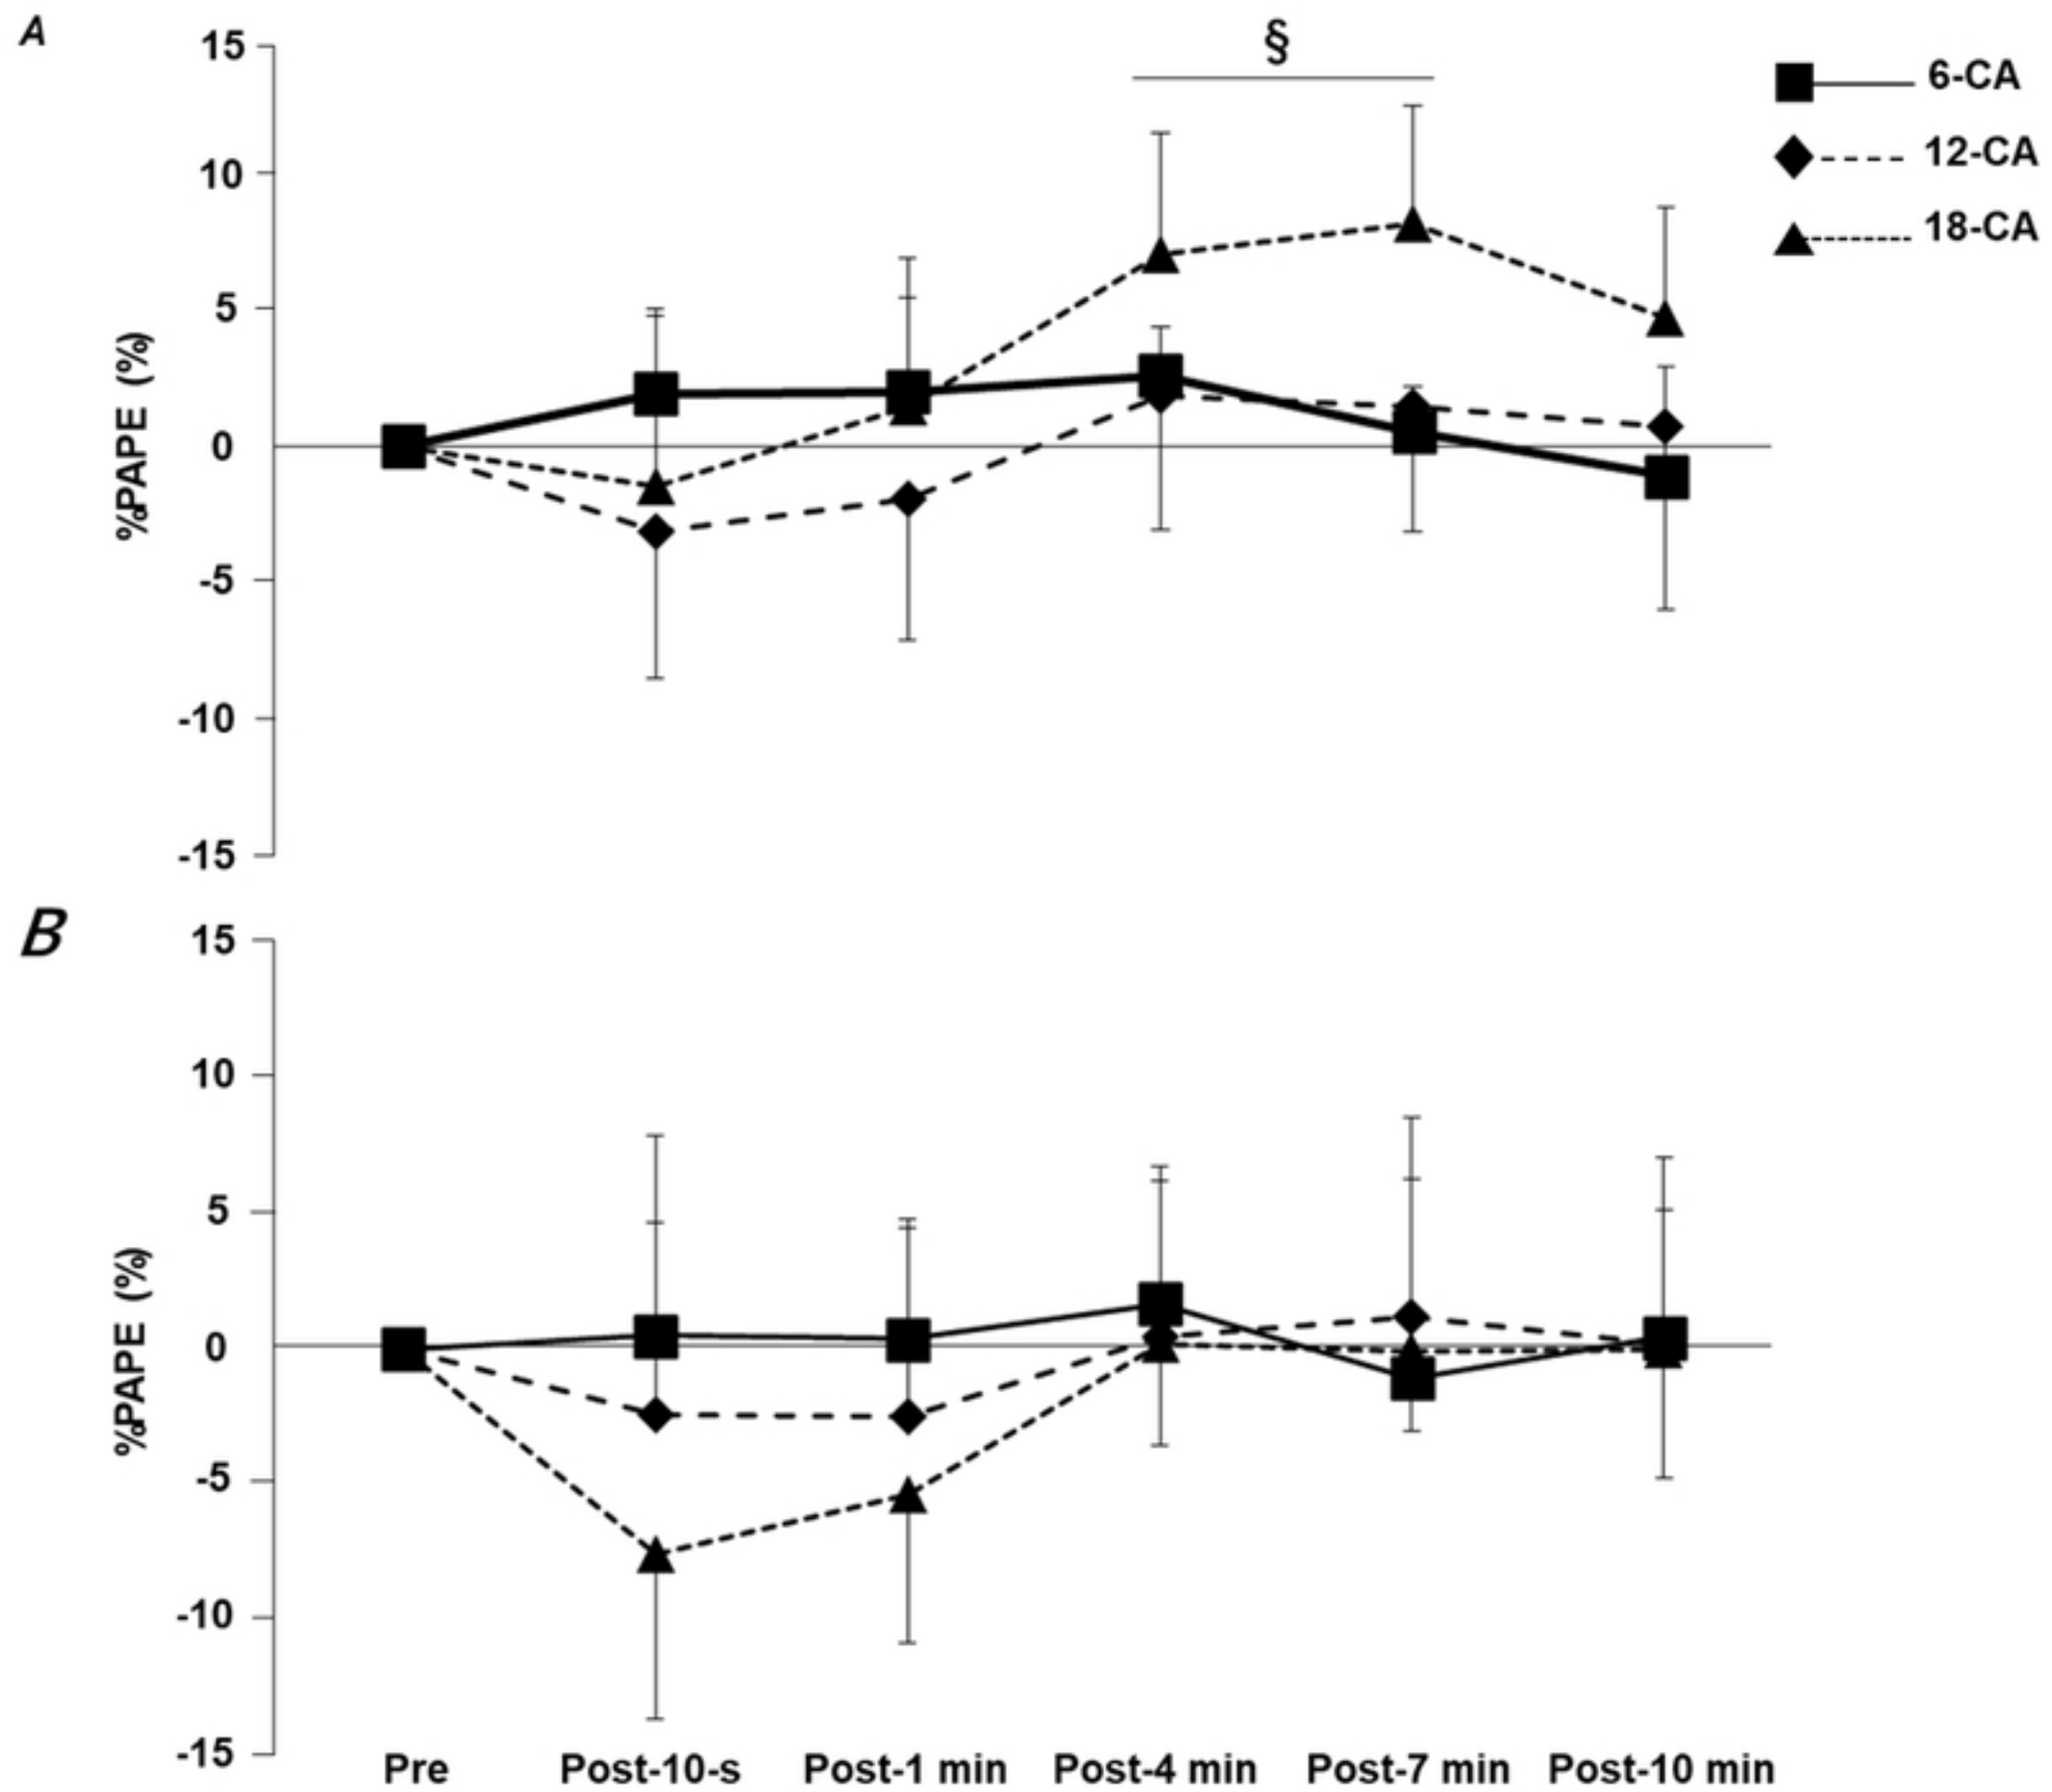

Fig 5

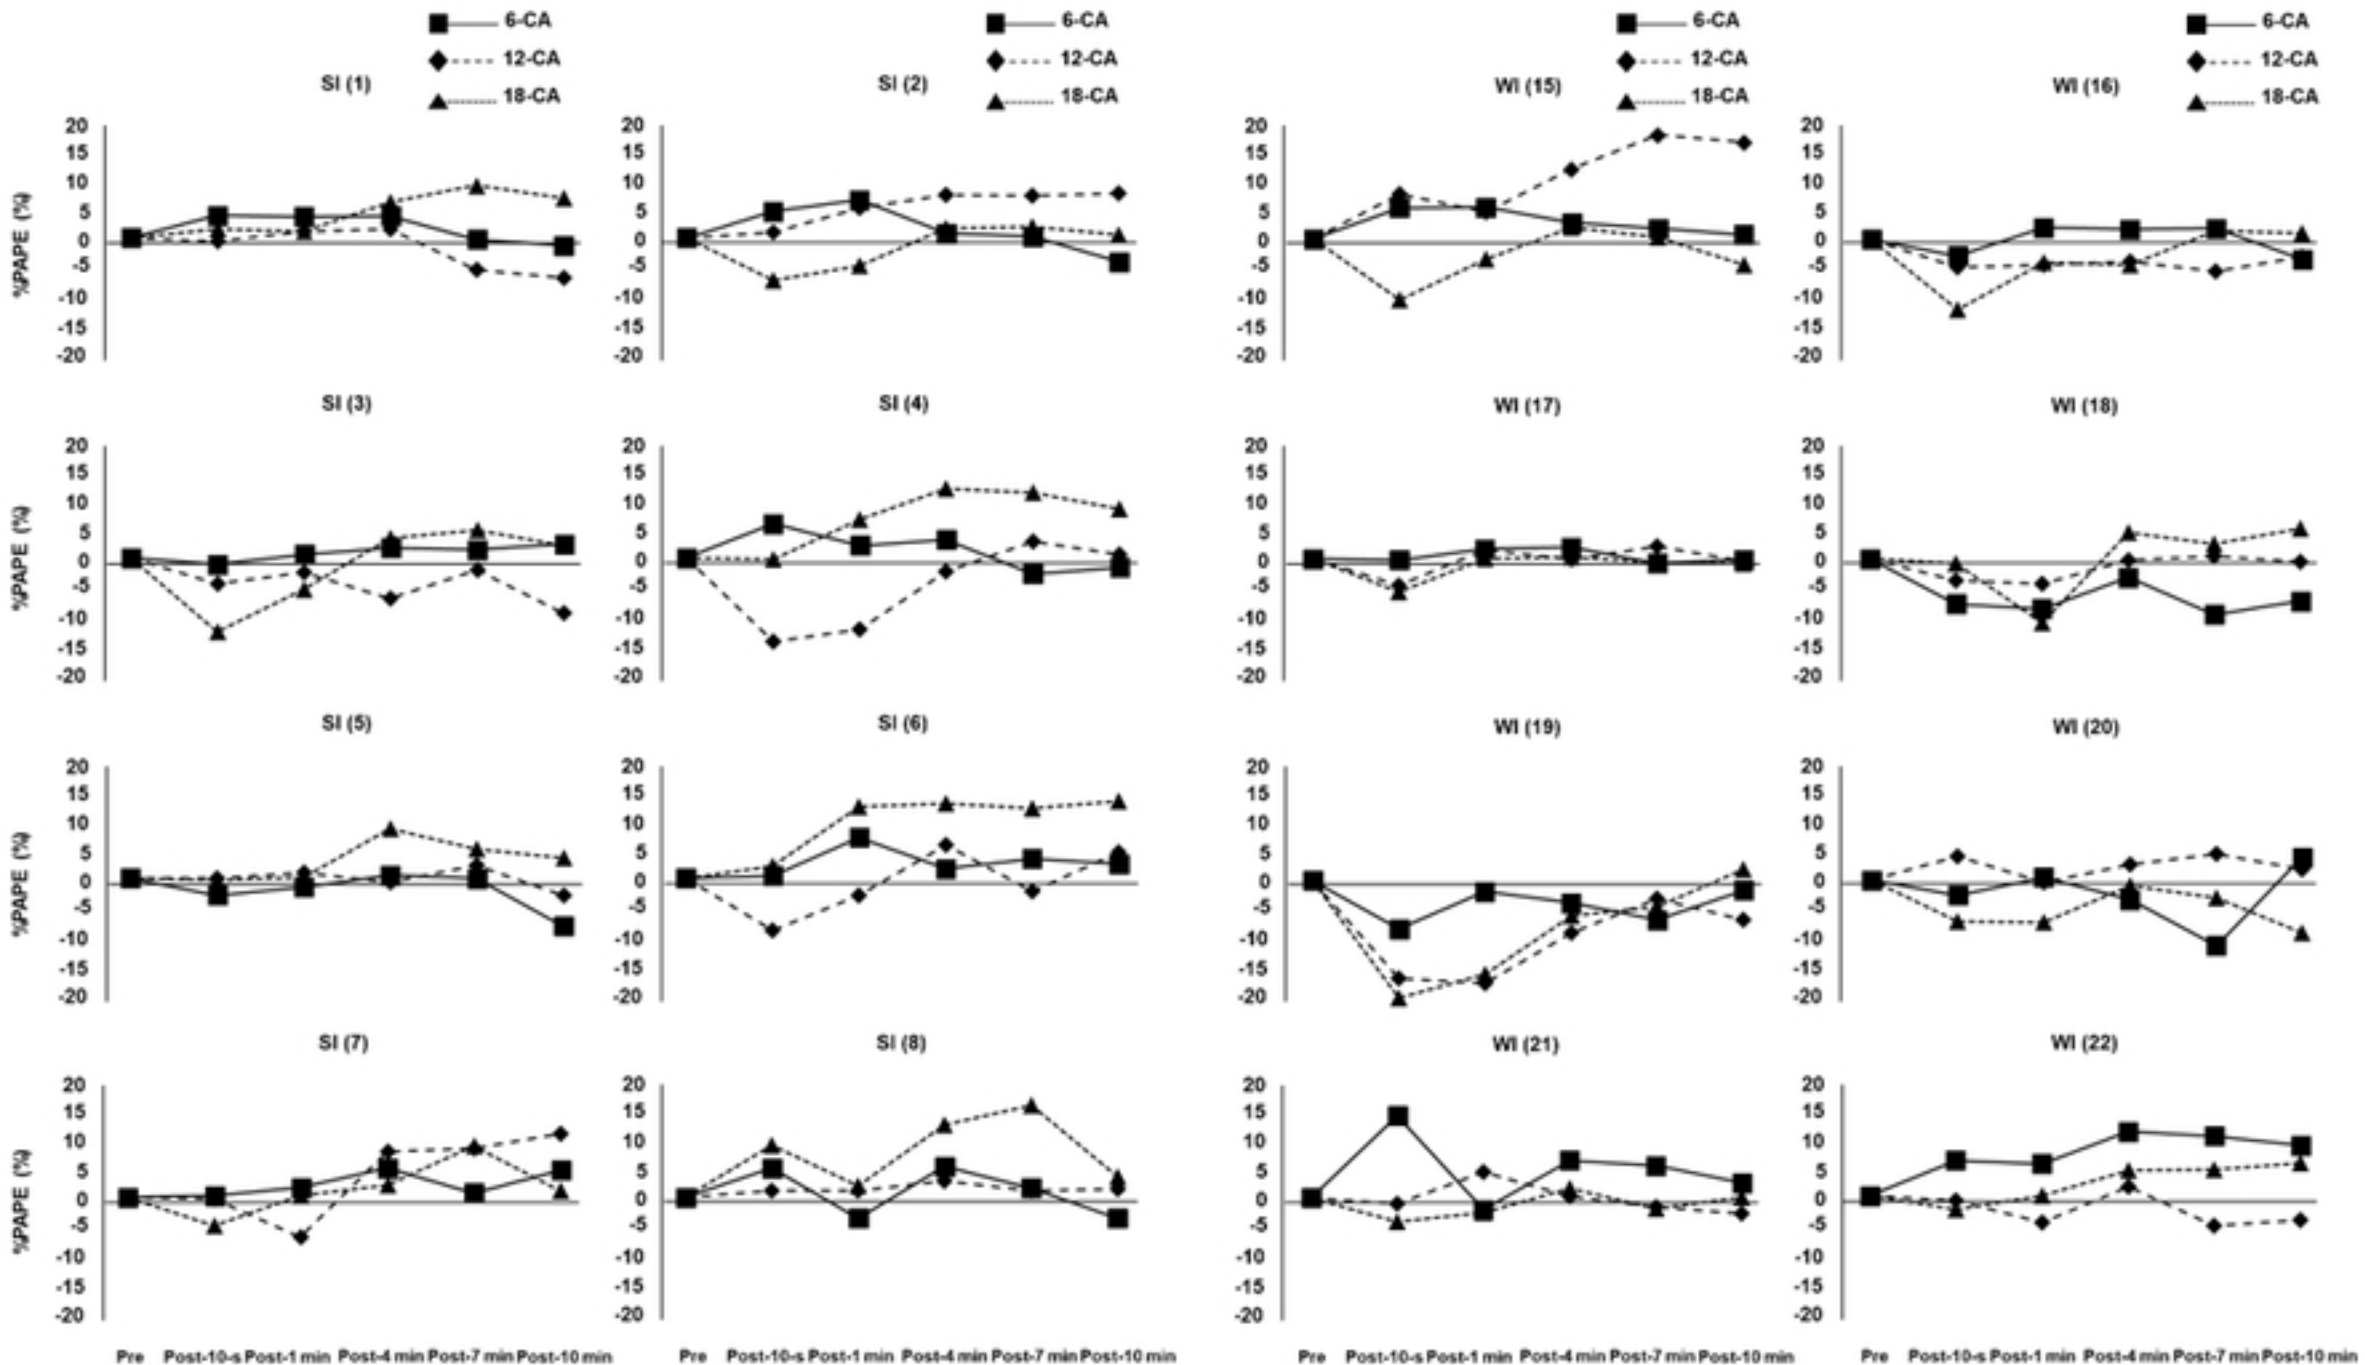

Fig 6
